# Supplementary material
Source: publisher site journal article supplement (https://www.dovepress.com/get_supplementary_file.php?f=269355.docx)
Supplement: Supplementary file 1 [file get_supplementary_file.php]

Appendix 1. Structured search strategies for various databases

**Population: chronic myeloid leukemia**

| PubMed | | Cochrane Library (CENTRAL) | | CINAHL (EBSCOhost) | | APA PsycINFO | | Web of Science | |
| --- | --- | --- | --- | --- | --- | --- | --- | --- | --- |
| #1 | "Leukemia, Myelogenous, Chronic, BCR-ABL Positive"[Mesh:exp] | #1 | Leukemia, Myelogenous, Chronic, BCR-ABL Positive[MeSH:exp] | #1 | MH "Leukemia, Myeloid, Chronic" | #1 | Any Field “chronic myeloid leuk*” | #1 | ALL=(chronic myeloid leuk*) |
| #2 | “chronic myeloid leuk*”[tw] | #2 | chronic NEXT myeloid NEXT leuk*:kw | #2 | TX “chronic myeloid leuk*” | #2 | Any Field “chronic myelogeneous leuk*” | #2 | ALL=(chronic myelogeneous leuk*) |
| #3 | “chronic myelogeneous leuk*”[tw] | #3 | chronic NEXT myelogeneous NEXT leuk*:kw | #3 | TX “chronic myelogeneous leuk*” |  |  |  |  |
| #4 | #1 OR #2 OR #3 | #4 | #1 OR #2 OR #3 | #4 | #1 OR #2 OR #3 | #3 | #1 OR #2 | #3 | #1 OR #2 |

**Population: tyrosine kinase inhibitor**

| PubMed | | Cochrane library (CENTRAL) | | CINAHL (EBSCOhost) | | APA PsycINFO | | Web of Science | |
| --- | --- | --- | --- | --- | --- | --- | --- | --- | --- |
| #5 | "Protein Kinase Inhibitors"[Mesh:exp] | #5 | Protein Kinase Inhibitors[Mesh:exp] | #5 | MH "Tyrosine Kinase Inhibitors+" | #4 | Any Field "Protein Kinase Inhibitor*" | #4 | ALL=(protein kinase inhibitor*) | |
| #6 | "Imatinib Mesylate"[Mesh:exp] | #6 | Imatinib Mesylate[Mesh:exp] | #6 | MH "Imatinib" | #5 | Any Field “tyrosine kinase inhibitor*” | #5 | ALL=(tyrosine kinase inhibitor*) | |
| #7 | "4-methyl-N-(3-(4-methylimidazol-1-yl)-5-(trifluoromethyl)phenyl)-3-((4-pyridin-3-ylpyrimidin-2-yl)amino)benzamide" [sc] | #7 | Dasatinib[Mesh:exp] | #7 | MH "Nilotinib" | #6 | Any Field: imatinib | #6 | ALL=(imatinib) | |
| #8 | "Dasatinib"[Mesh:exp] | #8 | tyrosine NEXT kinase NEXT inhibitor* | #8 | MH "Dasatinib" | #7 | Any Field: nilotinib | #7 | ALL=(nilotinib) | |
| #9 | "bosutinib" [Sc] | #9 | imatinib:kw | #9 | TX “tyrosine kinase inhibitor*” | #8 | Any Field: dasatinib | #8 | ALL=(dasatinib) | |
| #10 | "ponatinib" [Sc] | #10 | nilotinib:kw | #10 | TX imatinib | #9 | Any Field: bosutinib | #9 | ALL=(bosutinib) | |
| #11 | “tyrosine kinase inhibitor*”[tw] | #11 | dasatinib:kw | #11 | TX nilotinib | #10 | Any Field: ponatinib | #10 | ALL=(ponatinib) | |
| #12 | imatinib[tw] | #12 | bosutinib:kw | #12 | TX dasatinib |  |  |  |  | |
| #13 | nilotinib[tw] | #13 | ponatinib:kw | #13 | TX bosutinib |  |  |  |  | |
| #14 | dasatinib[tw] |  |  | #14 | TX ponatinib |  |  |  |  | |
| #15 | bosutinib[tw] |  |  |  |  |  |  |  |  | |
| #16 | ponatinib[tw] |  |  |  |  |  |  |  |  | |
| #17 | OR #5-#16 | #14 | OR #5-#13 | #15 | OR #5-#14 | #11 | OR #4-#10 | #11 | OR #4-#10 | |

**Outcome - medication adherence**

| PubMed | | Cochrane library (CENTRAL) | | CINAHL (EBSCOhost) | | APA PsycINFO | | Web of Science | |
| --- | --- | --- | --- | --- | --- | --- | --- | --- | --- |
| #18 | "Treatment Adherence and Compliance"[Mesh:exp] | #15 | Treatment Adherence and Compliance[Mesh:exp] | #16 | MH "Medication Compliance" | #12 | Any Field: adherence | #12 | ALL=(adherence) |
| #19 | "Medication Adherence"[Mesh:exp] | #16 | Medication Adherence[Mesh:exp] | #17 | TX adherence | #13 | Any Field: compliance | #13 | ALL=(compliance) |
| #20 | "Patient Compliance"[Mesh:exp] | #17 | Patient Compliance[Mesh:exp] | #18 | TX compliance |  |  |  |  |
| #21 | adherence[tw] | #18 | adherence:kw |  |  |  |  |  |  |
| #22 | compliance[tw] | #19 | compliance:kw |  |  |  |  |  |  |
| #23 | OR #18-#22 | #20 | OR #15-#19 | #19 | OR #16-#18 | #14 | #12 OR #13 | #14 | #12 OR #13 |

**Study design**

| PubMed | | Cochrane library (CENTRAL) | | CINAHL (EBSCOhost) | | APA PsycINFO | | Web of Science | |
| --- | --- | --- | --- | --- | --- | --- | --- | --- | --- |
| #24 | "Qualitative research"[MeSH:exp] | #21 | Qualitative Research[Mesh:exp] | #20 | MH "Qualitative Studies+" | #15 | Any Field: qualitative | #15 | ALL=(qualitative) |
| #25 | “focus Groups”[MeSH:exp] | #22 | Focus Groups[MeSH:exp] | #21 | TX qualitative |  |  |  |  |
| #26 | Editorial [pt] | #23 | Qualitative:kw |  |  |  |  |  |  |
| #27 | Comment [pt] |  |  |  |  |  |  |  |  |
| #28 | Qualitative [tw] |  |  |  |  |  |  |  |  |
| #29 | NOT #24-#28 | #24 | OR #21-#23 | #22 | #20 OR #21 |  |  |  |  |
| #30 | **#4 AND #17 AND #23 NOT #29** | **#25** | **#4 AND #14 AND #20 NOT #24** | **#23** | **#4 AND #15 AND #19 NOT #22** | **#16** | **#3 AND #11 AND #14 NOT #15** | **#16** | **#3 AND #11 AND #14 NOT #15** |
